# Supplementary material
Source: publisher figshare collection journal article supplement (https://gsapubs.figshare.com/articles/dataset/_/19424348)
Supplement: Supplementary file 1 [file 1]

## Sheet: Sheet1
Station Information					Event Information								Individual and Station-averaged Measurements
Station	Lon (°)	Lat (°)	Dist (km)		Date	Time	Lat (°)	Lon (°)	Depth (km)	Mag	Phase		FD (°)	Delay (s)	Category	FDa (°)	Delaya (s)	Fda, err (°)	Delaya, err (s)
CHIC	73.9732	43.1849	224.5		2006-01-02	22:13:41	-19.95	-178.1	589.4	6.4	SKS		66	1.03	fair	62.2	1.29	7.9	0.1
					2006-02-26	03:08:28	-23.56	-179.87	540.7	6	SKKS		65	1.44	good
					2006-03-07	06:28:55	-14.81	167.36	144.7	5.7	SKS		61	1.23	fair
					2006-03-31	13:21:01	-29.55	-176.65	17.3	6	SKKS		63	1.23	good
					2006-04-17	23:50:01	-12.47	166.26	32.3	5.6	SKS		62	1.33	fair
					2006-04-30	08:17:35	-15.06	167.42	134.9	5.5	SKS		62	1.23	fair
					2006-06-02	07:31:35	-20.81	-178.56	587.3	5.5	SKS		53	1.33	fair
					2006-06-02	07:31:35	-20.81	-178.56	587.3	5.5	SKKS		61	1.23	fair
					2006-08-07	22:18:55	-15.8	167.82	156	6.1	SKS		62	1.33	good
					2006-08-25	00:44:45	-24.36	-66.97	180.7	5.9	SKKS		47	1.23	fair
					2006-09-03	22:57:30	-24.03	178.88	568.8	5.8	SKKS		62	1.23	good
					2006-09-17	09:34:13	-31.67	-66.95	136.2	5.7	SKKS		74	1.64	fair
					2006-09-29	13:08:25	10.85	-61.64	52.5	6	SKS		81	1.13	fair
					2006-10-18	10:45:34	-15.03	167.29	128.7	5.5	SKS		58	1.33	fair
					2006-10-18	10:45:34	-15.03	167.29	128.7	5.5	SKKS		67	1.33	fair
					2007-01-23	17:16:20	-13.14	167.04	192.2	5.8	SKS		62	1.33	good
					2007-04-04	11:00:28	-20.78	168.96	15.2	6	SKS		51	1.33	fair
BESH	73.9742	43.0633	212.8		2006-03-07	06:28:55	-14.81	167.36	144.7	5.7	SKS		65	1.33	good	66.8	1.16	7.1	0.2
					2006-03-31	13:21:01	-29.55	-176.65	17.3	6	SKKS		65	1.33	good
					2006-04-17	23:50:01	-12.47	166.26	32.3	5.6	SKS		62	1.03	fair
					2006-04-30	08:17:35	-15.06	167.42	134.9	5.5	SKS		76	1.54	good
					2006-08-07	22:18:55	-15.8	167.82	156	6.1	SKS		71	1.23	good
					2006-08-25	00:44:45	-24.36	-66.97	180.7	5.9	SKKS		63	0.92	good
					2006-09-29	13:08:25	10.85	-61.64	52.5	6	SKS		78	0.92	good
					2006-10-03	18:03:14	-18.98	169.02	168.3	5.9	SKS		71	1.33	fair
					2006-10-18	10:45:34	-15.03	167.29	128.7	5.5	SKS		55	0.92	fair
					2007-04-04	11:00:28	-20.78	168.96	15.2	6	SKS		62	1.03	fair
HORS	74.0008	42.9597	201.7		2005-11-17	19:26:54	-22.42	-67.89	148.7	6	SKKS		45	0.72	fair	60.7	0.82	11	0.2
					2006-03-07	06:28:55	-14.81	167.36	144.7	5.7	SKS		72	1.13	fair
					2006-03-31	13:21:01	-29.55	-176.65	17.3	6	SKKS		55	0.92	fair
					2006-08-07	22:18:55	-15.8	167.82	156	6.1	SKS		74	0.72	fair
					2006-08-11	14:30:39	18.49	-101.15	60.7	6	SKKS		62	0.92	good
					2006-08-25	00:44:45	-24.36	-66.97	180.7	5.9	SKKS		56	0.51	fair
FOOD	73.9695	42.8559	193		2005-10-25	05:15:20	-22.84	-176.03	131	5.5	SKKS		64	2.26	fair	73.8	1.03	24	0.7
					2005-11-17	19:26:54	-22.42	-67.89	148.7	6	SKKS		69	0.72	fair
					2006-09-29	13:08:25	10.85	-61.64	52.5	6	SKS		115	0.92	fair
					2006-11-13	01:26:36	-26.09	-63.37	568.1	6.3	SKKS		72	0.82	fair
					2007-04-04	11:00:28	-20.78	168.96	15.2	6	SKS		52	0.41	fair
MURA	74.0153	42.7582	181.7		2005-12-23	21:47:27	-1.42	-77.6	191.4	5.7	SKKS		-	-	null	56.7	0.92	24	0.5
					2006-08-07	22:18:55	-15.8	167.82	156	6.1	SKS		71	0.41	fair
					2006-08-11	14:30:39	18.49	-101.15	60.7	6	SKKS		61	1.54	fair
					2006-08-25	00:44:45	-24.36	-66.97	180.7	5.9	SKKS		85	0.72	fair
					2006-10-03	18:03:14	-18.98	169.02	168.3	5.9	SKS		42	0.72	fair
					2006-10-18	10:45:34	-15.03	167.29	128.7	5.5	SKS		24	1.23	fair
IVTA	74.0088	42.6096	167.7		2006-04-30	08:17:35	-15.06	167.42	134.9	5.5	SKS		-	-	null	62	1.64	0	0
					2006-08-11	14:30:39	18.49	-101.15	60.7	6	SKKS		62	1.64	fair
QUAR	74.0493	42.5636	161.5		2006-03-31	13:21:01	-29.55	-176.65	17.3	6	SKKS		67	0.82	good	69.7	0.79	10.9	0.2
					2006-08-07	22:18:55	-15.8	167.82	156	6.1	SKS		85	1.03	fair
					2006-09-03	22:57:30	-24.03	178.88	568.8	5.8	SKS		68	0.51	fair
					2007-04-04	11:00:28	-20.78	168.96	15.2	6	SKS		59	0.82	fair
SOUR	74.083	42.4555	149.7		2005-08-07	02:17:44	-47.09	33.54	0.1	5.7	SKS		64	0.72	fair	83.4	0.79	17.5	0.1
					2006-04-17	23:50:01	-12.47	166.26	32.3	5.6	SKS		-	-	null
					2006-06-02	07:31:35	-20.81	-178.56	587.3	5.5	SKS		-	-	null
					2006-08-07	22:18:55	-15.8	167.82	156	6.1	SKS		88	0.92	fair
					2006-09-29	13:08:25	10.85	-61.64	52.5	6	SKS		98	0.72	fair
					2006-10-18	10:45:34	-15.03	167.29	128.7	5.5	SKS		-	-	null
SHOR	74.0643	42.2964	135.2		2005-09-26	01:55:38	-5.73	-76.34	127.7	6.8	SKKS		-	-	null	68.8	0.6	19.2	0.4
					2005-11-17	19:26:54	-22.42	-67.89	148.7	6	SKKS		-	-	null
					2006-02-26	03:08:28	-23.56	-179.87	540.7	6	SKKS		86	0.82	fair
					2006-03-07	06:28:55	-14.81	167.36	144.7	5.7	SKS		72	0.21	fair
					2006-06-02	07:31:35	-20.81	-178.56	587.3	5.5	SKKS		33	0.31	fair
					2006-08-11	14:30:39	18.49	-101.15	60.7	6	SKKS		62	1.33	fair
					2006-08-25	00:44:45	-24.36	-66.97	180.7	5.9	SKKS		-	-	null
					2007-04-25	13:34:16	-14.23	166.83	69.7	5.9	SKS		79	0.31	fair
					2007-05-06	21:11:52	-19.39	-179.26	679.7	5.9	SKKS		79	0.62	fair
AKMO	74.0811	42.1668	122		2006-01-02	22:13:41	-19.95	-178.1	589.4	6.4	SKS		-	-	null	-	-	-	-
					2006-04-17	23:50:01	-12.47	166.26	32.3	5.6	SKS		-	-	null
BOOB	74.1619	42.0359	106		2005-08-14	02:39:39	-19.85	-69.13	111.1	5.8	SKKS		-	-	null	66.3	1.38	28.7	0.4
					2005-11-17	19:26:54	-22.42	-67.89	148.7	6	SKKS		-	-	null
					2006-02-26	03:08:28	-23.56	-179.87	540.7	6	SKKS		82	1.54	fair
					2006-03-07	06:28:55	-14.81	167.36	144.7	5.7	SKS		87	1.74	fair
					2006-05-06	02:29:31	-24.99	179.76	519.3	5.5	SKKS		69	1.44	fair
					2006-08-11	14:30:39	18.49	-101.15	60.7	6	SKKS		24	0.82	fair
MINT	74.2246	41.9159	91.8		2006-02-26	03:08:28	-23.56	-179.87	540.7	6	SKKS		73	1.23	fair	75.3	0.95	8.4	0.3
					2006-03-07	06:28:55	-14.81	167.36	144.7	5.7	SKS		78	0.62	fair
					2006-08-07	22:18:55	-15.8	167.82	156	6.1	SKS		85	0.92	fair
					2006-08-11	14:30:39	18.49	-101.15	60.7	6	SKKS		65	1.03	fair
					2006-08-25	00:44:45	-24.36	-66.97	180.7	5.9	SKKS		-	-	null
KYRC	74.3303	41.8676	82.8		2006-01-23	06:02:59	-17.32	167.82	31.5	5.6	SKS		80	1.13	fair	77	1.16	8.6	0.3
					2006-02-26	03:08:28	-23.56	-179.87	540.7	6	SKS		83	1.44	fair
					2006-02-26	03:08:28	-23.56	-179.87	540.7	6	SKKS		70	1.54	fair
					2006-03-07	06:28:55	-14.81	167.36	144.7	5.7	SKS		78	1.13	fair
					2006-04-30	08:17:35	-15.06	167.42	134.9	5.5	SKS		80	1.03	fair
					2006-08-07	22:18:55	-15.8	167.82	156	6.1	SKS		81	1.23	fair
					2006-08-11	14:30:39	18.49	-101.15	60.7	6	SKKS		55	0.62	fair
					2006-09-17	09:34:13	-31.67	-66.95	136.2	5.7	SKKS		80	1.03	fair
					2007-04-25	13:34:16	-14.23	166.83	69.7	5.9	SKS		84	1.44	fair
					2007-05-06	21:11:52	-19.39	-179.26	679.7	5.9	SKKS		78	1.03	fair
BESM	74.4555	41.7973	70.8		2005-08-14	02:39:39	-19.85	-69.13	111.1	5.8	SKKS		-	-	null	65	1.01	8.9	0.2
					2006-02-26	03:08:28	-23.56	-179.87	540.7	6	SKS		79	1.33	fair
					2006-02-26	03:08:28	-23.56	-179.87	540.7	6	SKKS		61	0.92	fair
					2006-03-07	06:28:55	-14.81	167.36	144.7	5.7	SKS		70	0.82	fair
					2006-03-31	13:21:01	-29.55	-176.65	17.3	6	SKKS		67	0.82	fair
					2006-04-30	08:17:35	-15.06	167.42	134.9	5.5	SKS		62	0.92	fair
					2006-08-11	14:30:39	18.49	-101.15	60.7	6	SKKS		66	1.03	good
					2007-01-23	17:16:20	-13.14	167.04	192.2	5.8	SKS		50	1.23	fair
KUNT	74.5167	41.6734	56.3		2005-08-14	02:39:39	-19.85	-69.13	111.1	5.8	SKKS		84	0.72	fair	68.3	1	10.6	0.2
					2005-08-25	23:09:18	-23.6	-179.87	533	6.2	SKS		77	0.82	fair
					2006-01-23	06:02:59	-17.32	167.82	31.5	5.6	SKS		73	1.23	fair
					2006-02-26	03:08:28	-23.56	-179.87	540.7	6	SKS		69	1.13	good
					2006-02-26	03:08:28	-23.56	-179.87	540.7	6	SKKS		56	1.33	good
					2006-03-07	06:28:55	-14.81	167.36	144.7	5.7	SKS		63	1.13	good
					2006-03-19	04:36:58	-13.5	172.47	50.2	5.7	SKS		75	0.82	fair
					2006-03-31	13:21:01	-29.55	-176.65	17.3	6	SKKS		73	1.03	fair
					2006-04-01	17:55:57	-29.84	-176.86	23.3	5.9	SKKS		39	1.13	fair
					2006-04-17	23:50:01	-12.47	166.26	32.3	5.6	SKS		78	1.33	fair
					2006-04-30	08:17:35	-15.06	167.42	134.9	5.5	SKS		72	0.92	fair
					2006-06-02	07:31:35	-20.81	-178.56	587.3	5.5	SKS		72	0.92	fair
					2006-06-02	07:31:35	-20.81	-178.56	587.3	5.5	SKKS		49	1.23	fair
					2006-08-07	22:18:55	-15.8	167.82	156	6.1	SKS		72	1.03	fair
					2006-08-15	23:53:47	-21.22	-176.14	162.7	5.9	SKKS		60	1.03	fair
					2006-08-25	00:44:45	-24.36	-66.97	180.7	5.9	SKKS		87	0.72	fair
					2006-09-03	22:57:30	-24.03	178.88	568.8	5.8	SKS		69	1.13	good
					2006-09-03	22:57:30	-24.03	178.88	568.8	5.8	SKKS		68	1.03	fair
					2006-09-29	13:08:25	10.85	-61.64	52.5	6	SKS		82	0.62	fair
					2006-10-03	18:03:14	-18.98	169.02	168.3	5.9	SKS		70	1.03	fair
					2006-10-18	10:45:34	-15.03	167.29	128.7	5.5	SKS		65	0.82	fair
					2007-01-23	17:16:20	-13.14	167.04	192.2	5.8	SKS		67	1.03	fair
					2007-04-04	11:00:28	-20.78	168.96	15.2	6	SKS		51	1.03	fair
					2007-04-09	02:24:29	-20.11	-177.98	608.7	5.5	SKS		70	0.92	fair
					2007-04-25	13:34:16	-14.23	166.83	69.7	5.9	SKS		67	1.03	good
					2007-05-06	21:11:52	-19.39	-179.26	679.7	5.9	SKS		70	0.92	fair
					2007-05-06	21:11:52	-19.39	-179.26	679.7	5.9	SKKS		64	1.03	good
TEKE	74.6602	41.5882	42.1		2005-08-14	02:39:39	-19.85	-69.13	111.1	5.8	SKKS		86	0.92	fair	66.9	1.03	20.3	0.2
					2005-09-26	01:55:38	-5.73	-76.34	127.7	6.8	SKKS		-	-	null
					2005-12-23	21:47:27	-1.42	-77.6	191.4	5.7	SKKS		117	0.72	fair
					2006-01-23	06:02:59	-17.32	167.82	31.5	5.6	SKS		70	1.13	fair
					2006-02-26	03:08:28	-23.56	-179.87	540.7	6	SKS		62	0.92	fair
					2006-03-07	06:28:55	-14.81	167.36	144.7	5.7	SKS		74	1.23	good
					2006-03-31	13:21:01	-29.55	-176.65	17.3	6	SKKS		61	0.82	fair
					2006-04-17	23:50:01	-12.47	166.26	32.3	5.6	SKS		66	0.92	fair
					2006-04-30	08:17:35	-15.06	167.42	134.9	5.5	SKS		52	1.03	fair
					2006-06-02	07:31:35	-20.81	-178.56	587.3	5.5	SKS		55	1.33	good
					2006-08-07	22:18:55	-15.8	167.82	156	6.1	SKS		69	1.03	fair
					2006-08-11	14:30:39	18.49	-101.15	60.7	6	SKKS		56	0.82	good
					2006-09-03	22:57:30	-24.03	178.88	568.8	5.8	SKS		30	1.33	fair
					2006-09-03	22:57:30	-24.03	178.88	568.8	5.8	SKKS		76	1.13	fair
DEU4	74.7596	41.5143	30.8		2005-09-26	01:55:38	-5.73	-76.34	127.7	6.8	SKKS		-	-	null	53	1	12.6	0.2
					2006-01-23	06:02:59	-17.32	167.82	31.5	5.6	SKS		53	1.03	fair
					2006-02-02	12:48:43	-17.74	-178.21	601.2	6	SKKS		34	1.03	fair
					2006-02-26	03:08:28	-23.56	-179.87	540.7	6	SKS		64	1.13	fair
					2006-02-26	03:08:28	-23.56	-179.87	540.7	6	SKKS		58	0.82	fair
					2006-03-07	06:28:55	-14.81	167.36	144.7	5.7	SKS		52	0.92	fair
					2006-03-31	13:21:01	-29.55	-176.65	17.3	6	SKKS		62	1.23	fair
					2006-04-17	23:50:01	-12.47	166.26	32.3	5.6	SKS		62	1.03	good
					2006-04-30	08:17:35	-15.06	167.42	134.9	5.5	SKS		58	1.13	good
					2006-05-06	02:29:31	-24.99	179.76	519.3	5.5	SKKS		79	1.13	fair
					2006-06-02	07:31:35	-20.81	-178.56	587.3	5.5	SKS		57	0.82	fair
					2006-06-02	07:31:35	-20.81	-178.56	587.3	5.5	SKKS		42	0.82	fair
					2006-08-07	22:18:55	-15.8	167.82	156	6.1	SKS		67	0.82	good
					2006-08-11	14:30:39	18.49	-101.15	60.7	6	SKKS		32	0.62	good
					2006-09-03	22:57:30	-24.03	178.88	568.8	5.8	SKS		51	1.03	fair
					2006-10-03	18:03:14	-18.98	169.02	168.3	5.9	SKS		63	1.23	fair
					2006-10-08	13:50:25	-23.72	-175.45	16.1	5.7	SKKS		36	1.44	fair
					2006-10-18	10:45:34	-15.03	167.29	128.7	5.5	SKS		55	1.03	good
					2007-04-04	11:00:28	-20.78	168.96	15.2	6	SKS		34	1.13	fair
					2007-04-25	13:34:16	-14.23	166.83	69.7	5.9	SKS		61	1.13	fair
					2007-05-06	21:11:52	-19.39	-179.26	679.7	5.9	SKS		53	0.62	good
					2007-05-06	21:11:52	-19.39	-179.26	679.7	5.9	SKKS		39	0.92	fair
KOKD	74.7829	41.452	23.9		2006-01-23	06:02:59	-17.32	167.82	31.5	5.6	SKS		73	1.13	fair	66	1.02	8.2	0.3
					2006-02-02	12:48:43	-17.74	-178.21	601.2	6	SKKS		67	0.62	fair
					2006-02-26	03:08:28	-23.56	-179.87	540.7	6	SKS		70	1.03	good
					2006-02-26	03:08:28	-23.56	-179.87	540.7	6	SKKS		69	0.92	fair
					2006-03-07	06:28:55	-14.81	167.36	144.7	5.7	SKS		64	0.92	good
					2006-03-31	13:21:01	-29.55	-176.65	17.3	6	SKKS		73	1.54	fair
					2006-04-17	23:50:01	-12.47	166.26	32.3	5.6	SKS		48	0.72	fair
					2006-04-30	08:17:35	-15.06	167.42	134.9	5.5	SKS		74	1.64	good
					2006-06-02	07:31:35	-20.81	-178.56	587.3	5.5	SKS		57	0.82	fair
					2006-08-07	22:18:55	-15.8	167.82	156	6.1	SKS		65	0.82	fair
KARD	74.8682	41.366	12		2005-08-06	09:56:13	-19.69	-175.75	210	5.5	SKS		46	0.92	fair	62.2	0.89	11.3	0.2
					2006-02-26	03:08:28	-23.56	-179.87	540.7	6	SKS		79	1.33	fair
					2006-02-26	03:08:28	-23.56	-179.87	540.7	6	SKKS		47	1.13	fair
					2006-03-07	06:28:55	-14.81	167.36	144.7	5.7	SKS		67	0.82	fair
					2006-03-31	13:21:01	-29.55	-176.65	17.3	6	SKKS		63	1.23	fair
					2006-04-17	23:50:01	-12.47	166.26	32.3	5.6	SKS		64	0.82	fair
					2006-04-30	08:17:35	-15.06	167.42	134.9	5.5	SKS		64	0.92	good
					2006-06-02	07:31:35	-20.81	-178.56	587.3	5.5	SKS		74	1.03	fair
					2006-07-18	16:02:15	-20.05	-178.26	576.5	5.7	SKS		54	0.41	fair
					2006-08-07	22:18:55	-15.8	167.82	156	6.1	SKS		74	0.92	good
					2006-09-29	13:08:25	10.85	-61.64	52.5	6	SKS		65	0.72	fair
					2006-10-18	10:45:34	-15.03	167.29	128.7	5.5	SKS		65	0.82	fair
					2007-04-25	13:34:16	-14.23	166.83	69.7	5.9	SKS		74	0.92	good
					2007-05-06	21:11:52	-19.39	-179.26	679.7	5.9	SKS		54	0.82	fair
					2007-05-06	21:11:52	-19.39	-179.26	679.7	5.9	SKKS		42	0.51	fair
KAKK	74.9179	41.2606	-0.2		2006-01-23	06:02:59	-17.32	167.82	31.5	5.6	SKS		79	1.33	fair	67.6	1.01	15.4	0.3
					2006-02-02	12:48:43	-17.74	-178.21	601.2	6	SKKS		48	0.92	fair
					2006-02-26	03:08:28	-23.56	-179.87	540.7	6	SKS		73	0.92	good
					2006-02-26	03:08:28	-23.56	-179.87	540.7	6	SKKS		55	1.23	fair
					2006-03-07	06:28:55	-14.81	167.36	144.7	5.7	SKS		84	1.03	fair
					2006-03-31	13:21:01	-29.55	-176.65	17.3	6	SKKS		42	1.03	fair
					2006-04-17	23:50:01	-12.47	166.26	32.3	5.6	SKS		73	1.03	fair
					2006-06-02	07:31:35	-20.81	-178.56	587.3	5.5	SKS		83	1.13	fair
					2006-08-07	22:18:55	-15.8	167.82	156	6.1	SKS		77	1.13	fair
					2006-09-03	22:57:30	-24.03	178.88	568.8	5.8	SKS		75	1.13	fair
					2006-09-29	13:08:25	10.85	-61.64	52.5	6	SKS		79	0.62	fair
					2006-10-18	10:45:34	-15.03	167.29	128.7	5.5	SKS		72	1.03	fair
					2007-04-04	11:00:28	-20.78	168.96	15.2	6	SKS		81	1.54	good
					2007-05-06	21:11:52	-19.39	-179.26	679.7	5.9	SKS		49	0.41	fair
					2007-05-06	21:11:52	-19.39	-179.26	679.7	5.9	SKKS		43	0.72	fair
UCHS	74.9792	41.2028	-8.3		2005-11-17	19:26:54	-22.42	-67.89	148.7	6	SKKS		94	2.46	fair	73.2	1.3	15.9	0.6
					2006-02-26	03:08:28	-23.56	-179.87	540.7	6	SKS		69	0.92	fair
					2006-02-26	03:08:28	-23.56	-179.87	540.7	6	SKKS		42	0.82	fair
					2006-03-07	06:28:55	-14.81	167.36	144.7	5.7	SKS		75	1.13	fair
					2006-03-31	13:21:01	-29.55	-176.65	17.3	6	SKKS		77	1.23	fair
					2006-04-30	08:17:35	-15.06	167.42	134.9	5.5	SKS		72	0.72	fair
					2006-06-02	07:31:35	-20.81	-178.56	587.3	5.5	SKS		73	1.13	fair
					2006-08-07	22:18:55	-15.8	167.82	156	6.1	SKS		75	1.03	fair
					2006-08-25	00:44:45	-24.36	-66.97	180.7	5.9	SKKS		97	2.46	fair
					2006-09-29	13:08:25	10.85	-61.64	52.5	6	SKS		57	1.13	fair
KYZY	75.0283	41.1218	-18.2		2005-08-14	02:39:39	-19.85	-69.13	111.1	5.8	SKKS		58	1.03	fair	65.9	1.27	24.8	0.2
					2005-09-09	11:26:06	-31.6	-69.09	111.8	5.8	SKKS		137	1.74	good
					2006-01-23	06:02:59	-17.32	167.82	31.5	5.6	SKS		66	1.23	fair
					2006-02-26	03:08:28	-23.56	-179.87	540.7	6	SKS		67	1.64	fair
					2006-02-26	03:08:28	-23.56	-179.87	540.7	6	SKKS		44	1.33	good
					2006-03-31	13:21:01	-29.55	-176.65	17.3	6	SKKS		43	1.44	fair
					2006-04-17	23:50:01	-12.47	166.26	32.3	5.6	SKS		49	1.23	fair
					2006-08-07	22:18:55	-15.8	167.82	156	6.1	SKS		69	1.13	fair
					2006-08-11	14:30:39	18.49	-101.15	60.7	6	SKKS		61	1.13	fair
					2006-08-25	00:44:45	-24.36	-66.97	180.7	5.9	SKKS		83	1.23	fair
					2006-09-03	22:57:30	-24.03	178.88	568.8	5.8	SKS		61	1.13	fair
					2006-09-29	13:08:25	10.85	-61.64	52.5	6	SKS		69	1.03	fair
ORTK	75.0568	41.0394	-27.3		2006-01-23	06:02:59	-17.32	167.82	31.5	5.6	SKS		76	1.44	fair	58.5	1.2	13.5	0.2
					2006-02-26	03:08:28	-23.56	-179.87	540.7	6	SKS		64	1.33	good
					2006-02-26	03:08:28	-23.56	-179.87	540.7	6	SKKS		46	1.23	good
					2006-03-31	13:21:01	-29.55	-176.65	17.3	6	SKKS		48	1.13	good
					2006-08-11	14:30:39	18.49	-101.15	60.7	6	SKKS		64	1.03	fair
					2006-10-08	13:50:25	-23.72	-175.45	16.1	5.7	SKKS		53	1.03	fair
					2006-10-18	10:45:34	-15.03	167.29	128.7	5.5	SKS		70	1.44	good
					2007-04-04	11:00:28	-20.78	168.96	15.2	6	SKS		61	1.03	fair
					2007-04-09	02:24:29	-20.11	-177.98	608.7	5.5	SKS		36	1.13	fair
					2007-04-25	13:34:16	-14.23	166.83	69.7	5.9	SKS		63	1.23	fair
					2007-04-25	13:34:16	-14.23	166.83	69.7	5.9	SKKS		72	1.33	fair
					2007-05-06	21:11:52	-19.39	-179.26	679.7	5.9	SKS		71	1.23	fair
					2007-05-06	21:11:52	-19.39	-179.26	679.7	5.9	SKKS		36	1.03	fair
KULA	75.156	40.9751	-37.6		2005-08-06	09:56:13	-19.69	-175.75	210	5.5	SKS		55	0.62	fair	61.9	0.98	15.8	0.3
					2005-08-14	02:39:39	-19.85	-69.13	111.1	5.8	SKKS		92	0.92	fair
					2005-11-17	19:26:54	-22.42	-67.89	148.7	6	SKKS		87	0.82	fair
					2005-12-23	21:47:27	-1.42	-77.6	191.4	5.7	SKKS		79	0.72	fair
					2006-01-23	06:02:59	-17.32	167.82	31.5	5.6	SKS		78	1.74	fair
					2006-02-02	12:48:43	-17.74	-178.21	601.2	6	SKKS		33	0.82	fair
					2006-02-26	03:08:28	-23.56	-179.87	540.7	6	SKKS		37	1.13	fair
					2006-03-07	06:28:55	-14.81	167.36	144.7	5.7	SKS		60	0.92	good
					2006-03-31	13:21:01	-29.55	-176.65	17.3	6	SKKS		55	1.13	good
					2006-04-17	23:50:01	-12.47	166.26	32.3	5.6	SKS		69	0.72	fair
					2006-04-30	08:17:35	-15.06	167.42	134.9	5.5	SKS		46	0.82	good
					2006-08-07	22:18:55	-15.8	167.82	156	6.1	SKS		59	0.72	fair
					2006-08-11	14:30:39	18.49	-101.15	60.7	6	SKKS		65	1.23	fair
					2006-09-03	22:57:30	-24.03	178.88	568.8	5.8	SKS		73	0.92	fair
					2006-09-29	13:08:25	10.85	-61.64	52.5	6	SKS		71	0.92	fair
					2006-10-18	10:45:34	-15.03	167.29	128.7	5.5	SKS		56	0.92	fair
					2007-04-04	11:00:28	-20.78	168.96	15.2	6	SKS		67	1.13	good
					2007-04-25	13:34:16	-14.23	166.83	69.7	5.9	SKS		54	0.92	good
					2007-05-06	21:11:52	-19.39	-179.26	679.7	5.9	SKS		61	1.13	fair
					2007-05-06	21:11:52	-19.39	-179.26	679.7	5.9	SKKS		41	1.33	fair
DAMB	75.2613	40.8899	-50.2		2005-08-14	02:39:39	-19.85	-69.13	111.1	5.8	SKKS		82	0.82	fair	53.3	1.03	15.6	0.2
					2006-02-26	03:08:28	-23.56	-179.87	540.7	6	SKKS		35	1.13	fair
					2006-03-07	06:28:55	-14.81	167.36	144.7	5.7	SKS		67	1.03	good
					2006-03-31	13:21:01	-29.55	-176.65	17.3	6	SKKS		74	1.33	good
					2006-06-02	07:31:35	-20.81	-178.56	587.3	5.5	SKKS		42	1.23	fair
					2006-08-07	22:18:55	-15.8	167.82	156	6.1	SKS		44	0.92	fair
					2006-08-11	14:30:39	18.49	-101.15	60.7	6	SKKS		54	1.03	fair
					2006-09-03	22:57:30	-24.03	178.88	568.8	5.8	SKS		70	0.92	fair
					2006-09-03	22:57:30	-24.03	178.88	568.8	5.8	SKKS		46	1.03	fair
					2007-01-30	04:54:49	-54.92	146.22	7.2	6.2	SKS		-	-	null
					2007-04-09	02:24:29	-20.11	-177.98	608.7	5.5	SKS		58	0.72	fair
					2007-04-09	02:24:29	-20.11	-177.98	608.7	5.5	SKKS		38	1.03	fair
					2007-04-25	13:34:16	-14.23	166.83	69.7	5.9	SKS		48	0.82	fair
					2007-05-06	21:11:52	-19.39	-179.26	679.7	5.9	SKKS		36	1.33	fair
GOLB	75.2847	40.8177	-58.2		2005-09-12	21:15:05	-17.37	-177.3	404.7	5.5	SKKS		31	1.23	fair	48.7	1.06	14.7	0.3
					2005-11-17	19:26:54	-22.42	-67.89	148.7	6	SKKS		82	0.82	fair
					2006-01-02	22:13:41	-19.95	-178.1	589.4	6.4	SKS		37	0.82	fair
					2006-01-23	06:02:59	-17.32	167.82	31.5	5.6	SKS		69	1.13	fair
					2006-02-02	12:48:43	-17.74	-178.21	601.2	6	SKKS		37	1.44	fair
					2006-02-26	03:08:28	-23.56	-179.87	540.7	6	SKS		55	0.82	good
					2006-02-26	03:08:28	-23.56	-179.87	540.7	6	SKKS		34	1.13	fair
					2006-03-19	04:36:58	-13.5	172.47	50.2	5.7	SKS		57	1.13	fair
					2006-03-31	13:21:01	-29.55	-176.65	17.3	6	SKKS		50	0.82	fair
					2006-04-17	23:50:01	-12.47	166.26	32.3	5.6	SKS		33	0.62	fair
					2006-04-30	08:17:35	-15.06	167.42	134.9	5.5	SKS		50	1.03	fair
					2006-06-02	07:31:35	-20.81	-178.56	587.3	5.5	SKKS		37	1.44	fair
					2006-07-18	16:02:15	-20.05	-178.26	576.5	5.7	SKS		68	1.03	fair
					2006-08-07	22:18:55	-15.8	167.82	156	6.1	SKS		39	0.72	fair
					2006-08-11	14:30:39	18.49	-101.15	60.7	6	SKKS		61	1.64	fair
					2006-08-15	23:53:47	-21.22	-176.14	162.7	5.9	SKKS		34	0.72	fair
					2006-09-29	13:08:25	10.85	-61.64	52.5	6	SKS		65	1.44	fair
					2006-10-03	18:03:14	-18.98	169.02	168.3	5.9	SKS		38	1.33	fair
					2006-10-18	10:45:34	-15.03	167.29	128.7	5.5	SKS		44	0.92	fair
					2007-01-23	17:16:20	-13.14	167.04	192.2	5.8	SKS		54	0.92	fair
KOKA	75.6562	40.723	-82.8		2005-08-14	02:39:39	-19.85	-69.13	111.1	5.8	SKKS		91	1.33	fair	55.3	1.18	12	0.2
					2005-11-17	19:26:54	-22.42	-67.89	148.7	6	SKKS		66	1.23	fair
					2005-12-23	21:47:27	-1.42	-77.6	191.4	5.7	SKKS		-	-	null
					2006-01-02	22:13:41	-19.95	-178.1	589.4	6.4	SKS		52	1.23	fair
					2006-02-26	03:08:28	-23.56	-179.87	540.7	6	SKS		47	0.92	good
					2006-03-07	06:28:55	-14.81	167.36	144.7	5.7	SKS		56	1.23	good
					2006-04-17	23:50:01	-12.47	166.26	32.3	5.6	SKS		69	1.13	fair
					2006-04-30	08:17:35	-15.06	167.42	134.9	5.5	SKS		52	1.33	good
					2006-06-02	07:31:35	-20.81	-178.56	587.3	5.5	SKS		32	1.03	fair
					2006-08-07	22:18:55	-15.8	167.82	156	6.1	SKS		53	0.92	good
					2006-08-11	14:30:39	18.49	-101.15	60.7	6	SKKS		52	1.54	fair
					2006-08-15	23:53:47	-21.22	-176.14	162.7	5.9	SKS		45	1.03	good
					2006-09-03	22:57:30	-24.03	178.88	568.8	5.8	SKS		50	1.23	fair
					2006-10-18	10:45:34	-15.03	167.29	128.7	5.5	SKS		66	1.13	good
					2007-01-23	17:16:20	-13.14	167.04	192.2	5.8	SKS		53	1.23	fair
					2007-04-04	11:00:28	-20.78	168.96	15.2	6	SKS		60	1.03	good
					2007-04-25	13:34:16	-14.23	166.83	69.7	5.9	SKS		57	1.13	good
					2007-05-06	21:11:52	-19.39	-179.26	679.7	5.9	SKS		49	1.23	good
					2007-07-06	01:09:18	16.52	-93.78	122.6	5.7	SKKS		51	1.23	fair
					2007-07-15	09:27:36	-15.43	168.69	25.3	6	SKS		52	1.33	good
BRID	75.956	40.7117	-96.4		2005-08-14	02:39:39	-19.85	-69.13	111.1	5.8	SKKS		89	1.33	fair	73	1.33	22.6	0
					2005-09-22	00:07:22	-16.89	-172.66	14.9	6	SKS		57	1.33	fair
KORU	75.9143	40.615	-104		2005-08-14	02:39:39	-19.85	-69.13	111.1	5.8	SKKS		74	0.31	fair	61.8	0.76	11.4	0.3
					2006-02-26	03:08:28	-23.56	-179.87	540.7	6	SKS		76	0.92	fair
					2006-03-07	06:28:55	-14.81	167.36	144.7	5.7	SKS		44	0.62	fair
					2006-04-30	08:17:35	-15.06	167.42	134.9	5.5	SKS		69	1.13	fair
					2006-08-07	22:18:55	-15.8	167.82	156	6.1	SKS		46	0.41	fair
					2006-08-11	14:30:39	18.49	-101.15	60.7	6	SKKS		57	1.33	fair
					2007-04-04	11:00:28	-20.78	168.96	15.2	6	SKS		67	0.82	fair
					2007-04-25	13:34:16	-14.23	166.83	69.7	5.9	SKS		59	0.62	fair
					2007-07-15	09:27:36	-15.43	168.69	25.3	6	SKS		64	0.72	good
DEBE	75.9558	40.5304	-113.9		2005-07-26	14:11:35	-15.34	-72.89	105.7	5.9	SKKS		80	0.82	fair	50.2	1.02	25.1	0.5
					2005-08-06	09:56:13	-19.69	-175.75	210	5.5	SKS		45	1.03	fair
					2005-09-22	00:07:22	-16.89	-172.66	14.9	6	SKS		17	1.13	fair
					2005-12-23	21:47:27	-1.42	-77.6	191.4	5.7	SKKS		-	-	null
					2006-02-26	03:08:28	-23.56	-179.87	540.7	6	SKS		64	0.51	fair
					2006-03-07	06:28:55	-14.81	167.36	144.7	5.7	SKS		40	0.62	good
					2006-04-30	08:17:35	-15.06	167.42	134.9	5.5	SKS		33	0.72	fair
					2006-08-11	14:30:39	18.49	-101.15	60.7	6	SKKS		46	1.03	good
					2006-09-30	16:26:55	-15.57	-73.11	100.5	5.6	SKKS		110	2.36	fair
					2006-10-03	18:03:14	-18.98	169.02	168.3	5.9	SKS		66	0.82	fair
					2006-10-18	10:45:34	-15.03	167.29	128.7	5.5	SKS		31	0.92	fair
					2007-04-21	17:20:33	-13.86	166.76	45.7	5.8	SKS		40	1.13	fair
					2007-07-06	01:09:18	16.52	-93.78	122.6	5.7	SKKS		61	1.33	fair
					2007-07-15	09:27:36	-15.43	168.69	25.3	6	SKS		28	0.82	good
ORTO	75.7816	40.1647	-141.8		2006-02-26	03:08:28	-23.56	-179.87	540.7	6	SKS		72	0.92	good	65.6	0.89	14.9	0.3
					2006-02-26	03:08:28	-23.56	-179.87	540.7	6	SKKS		68	0.62	fair
					2006-04-17	23:50:01	-12.47	166.26	32.3	5.6	SKS		63	0.72	fair
					2006-08-11	14:30:39	18.49	-101.15	60.7	6	SKKS		48	0.41	fair
					2006-08-15	23:53:47	-21.22	-176.14	162.7	5.9	SKS		75	0.82	fair
					2006-09-29	13:08:25	10.85	-61.64	52.5	6	SKS		74	0.82	fair
					2006-10-03	18:03:14	-18.98	169.02	168.3	5.9	SKS		79	1.44	fair
					2006-10-18	10:45:34	-15.03	167.29	128.7	5.5	SKS		59	0.72	fair
					2007-01-23	17:16:20	-13.14	167.04	192.2	5.8	SKS		54	0.92	fair
					2007-04-04	11:00:28	-20.78	168.96	15.2	6	SKS		69	1.03	fair
					2007-04-25	13:34:16	-14.23	166.83	69.7	5.9	SKS		79	1.13	fair
					2007-05-06	21:11:52	-19.39	-179.26	679.7	5.9	SKS		82	1.23	fair
					2007-05-06	21:11:52	-19.39	-179.26	679.7	5.9	SKKS		29	0.82	fair
TLKC	75.7819	40.1112	-147		2006-02-26	03:08:28	-23.56	-179.87	540.7	6	SKS		81	2.05	fair	77.5	1.43	5.9	0.4
					2006-03-07	06:28:55	-14.81	167.36	144.7	5.7	SKS		86	1.85	fair
					2006-04-17	23:50:01	-12.47	166.26	32.3	5.6	SKS		78	1.54	fair
					2006-08-07	22:18:55	-15.8	167.82	156	6.1	SKS		81	1.54	fair
					2006-08-15	23:53:47	-21.22	-176.14	162.7	5.9	SKKS		78	1.54	fair
					2006-10-03	18:03:14	-18.98	169.02	168.3	5.9	SKS		69	1.13	fair
					2006-10-18	10:45:34	-15.03	167.29	128.7	5.5	SKS		71	0.92	fair
					2007-01-23	17:16:20	-13.14	167.04	192.2	5.8	SKS		69	1.03	fair
					2007-04-04	11:00:28	-20.78	168.96	15.2	6	SKS		79	1.33	fair
					2007-04-25	13:34:16	-14.23	166.83	69.7	5.9	SKS		83	1.33	fair
AHQI	75.7996	40.0733	-151.4		2006-08-07	22:18:55	-15.8	167.82	156	6.1	SKS		80	1.33	fair	76.8	1.18	7.9	0.4
					2006-08-11	14:30:39	18.49	-101.15	60.7	6	SKKS		-	-	null
					2007-04-04	11:00:28	-20.78	168.96	15.2	6	SKS		80	1.54	good
					2007-04-25	13:34:16	-14.23	166.83	69.7	5.9	SKS		82	1.23	fair
					2007-05-06	21:11:52	-19.39	-179.26	679.7	5.9	SKS		65	0.62	fair
TRKX	75.7831	40.0379	-154.1		2006-02-26	03:08:28	-23.56	-179.87	540.7	6	SKS		81	2.15	fair	77.9	1.47	5.8	0.5
					2006-03-07	06:28:55	-14.81	167.36	144.7	5.7	SKS		84	1.95	fair
					2006-03-31	13:21:01	-29.55	-176.65	17.3	6	SKKS		67	0.82	fair
					2006-04-17	23:50:01	-12.47	166.26	32.3	5.6	SKS		86	2.67	fair
					2006-04-30	08:17:35	-15.06	167.42	134.9	5.5	SKS		71	1.54	good
					2006-08-07	22:18:55	-15.8	167.82	156	6.1	SKS		82	1.23	good
					2006-08-15	23:53:47	-21.22	-176.14	162.7	5.9	SKKS		72	0.82	fair
					2006-10-03	18:03:14	-18.98	169.02	168.3	5.9	SKS		76	1.44	fair
					2006-10-18	10:45:34	-15.03	167.29	128.7	5.5	SKS		81	1.74	good
					2007-01-23	17:16:20	-13.14	167.04	192.2	5.8	SKS		71	0.82	fair
					2007-04-04	11:00:28	-20.78	168.96	15.2	6	SKS		84	1.64	fair
					2007-04-25	13:34:16	-14.23	166.83	69.7	5.9	SKS		79	1.33	good
					2007-05-06	21:11:52	-19.39	-179.26	679.7	5.9	SKS		79	1.44	fair
					2007-05-06	21:11:52	-19.39	-179.26	679.7	5.9	SKKS		77	1.03	fair
TEGL	75.8601	40.0047	-160.5		2006-02-26	03:08:28	-23.56	-179.87	540.7	6	SKS		74	1.33	fair	73.8	1.1	8.9	0.3
					2006-02-26	03:08:28	-23.56	-179.87	540.7	6	SKKS		84	0.92	fair
					2006-03-07	06:28:55	-14.81	167.36	144.7	5.7	SKS		81	1.33	fair
					2006-09-03	22:57:30	-24.03	178.88	568.8	5.8	SKS		80	1.23	fair
					2006-09-29	13:08:25	10.85	-61.64	52.5	6	SKS		73	0.82	fair
					2006-10-03	18:03:14	-18.98	169.02	168.3	5.9	SKS		70	1.23	fair
					2006-10-18	10:45:34	-15.03	167.29	128.7	5.5	SKS		67	1.03	fair
					2007-01-23	17:16:20	-13.14	167.04	192.2	5.8	SKS		65	0.72	fair
					2007-04-04	11:00:28	-20.78	168.96	15.2	6	SKS		77	1.44	fair
					2007-04-25	13:34:16	-14.23	166.83	69.7	5.9	SKS		85	1.54	fair
					2007-05-06	21:11:52	-19.39	-179.26	679.7	5.9	SKKS		56	0.51	fair
KRUK	75.9017	39.8685	-175.3		2006-01-02	22:13:41	-19.95	-178.1	589.4	6.4	SKS		74	0.92	fair	66.1	0.93	17.5	0.3
					2006-01-23	06:02:59	-17.32	167.82	31.5	5.6	SKS		81	0.72	fair
					2006-02-26	03:08:28	-23.56	-179.87	540.7	6	SKS		75	0.82	fair
					2006-03-07	06:28:55	-14.81	167.36	144.7	5.7	SKS		79	1.03	good
					2006-03-31	13:21:01	-29.55	-176.65	17.3	6	SKKS		45	0.62	fair
					2006-04-17	23:50:01	-12.47	166.26	32.3	5.6	SKS		75	0.92	fair
					2006-04-30	08:17:35	-15.06	167.42	134.9	5.5	SKS		81	1.33	good
					2006-05-06	02:29:31	-24.99	179.76	519.3	5.5	SKS		54	0.51	fair
					2006-06-02	07:31:35	-20.81	-178.56	587.3	5.5	SKS		75	0.82	fair
					2006-09-03	22:57:30	-24.03	178.88	568.8	5.8	SKS		77	0.92	fair
					2006-09-03	22:57:30	-24.03	178.88	568.8	5.8	SKKS		47	0.62	fair
					2006-09-29	13:08:25	10.85	-61.64	52.5	6	SKS		67	0.82	fair
					2006-10-03	18:03:14	-18.98	169.02	168.3	5.9	SKS		74	1.13	fair
					2007-01-23	17:16:20	-13.14	167.04	192.2	5.8	SKS		73	1.44	fair
					2007-04-04	11:00:28	-20.78	168.96	15.2	6	SKS		86	1.23	good
					2007-04-25	13:34:16	-14.23	166.83	69.7	5.9	SKS		78	0.92	good
					2007-05-06	21:11:52	-19.39	-179.26	679.7	5.9	SKS		60	0.62	fair
					2007-05-06	21:11:52	-19.39	-179.26	679.7	5.9	SKKS		26	0.72	fair
					2007-05-06	22:01:09	-19.35	-179.25	692.8	5.6	SKS		63	1.13	fair
					2007-05-06	22:01:09	-19.35	-179.25	692.8	5.6	SKKS		27	1.33	good
KKTM	76.0432	39.8654	-181.5		2005-11-17	19:26:54	-22.42	-67.89	148.7	6	SKKS		-	-	null	71.6	1.02	8.8	0.2
					2006-02-26	03:08:28	-23.56	-179.87	540.7	6	SKS		74	0.82	fair
					2006-02-26	03:08:28	-23.56	-179.87	540.7	6	SKKS		56	0.72	good
					2006-03-07	06:28:55	-14.81	167.36	144.7	5.7	SKS		79	1.13	good
					2006-04-01	17:55:57	-29.84	-176.86	23.3	5.9	SKKS		55	1.03	fair
					2006-04-17	23:50:01	-12.47	166.26	32.3	5.6	SKS		74	0.92	fair
					2006-04-30	08:17:35	-15.06	167.42	134.9	5.5	SKS		64	0.82	fair
					2006-09-03	22:57:30	-24.03	178.88	568.8	5.8	SKS		84	1.03	fair
					2006-10-03	18:03:14	-18.98	169.02	168.3	5.9	SKS		77	1.23	fair
					2006-10-08	13:50:25	-23.72	-175.45	16.1	5.7	SKKS		71	0.92	fair
					2006-10-18	10:45:34	-15.03	167.29	128.7	5.5	SKS		77	1.03	good
					2007-01-23	17:16:20	-13.14	167.04	192.2	5.8	SKS		70	1.33	good
					2007-04-04	11:00:28	-20.78	168.96	15.2	6	SKS		74	1.03	good
					2007-04-25	13:34:16	-14.23	166.83	69.7	5.9	SKS		82	1.33	fair
					2007-05-06	21:11:52	-19.39	-179.26	679.7	5.9	SKS		65	0.92	good
AQKE	76.0884	39.761	-193.5		2005-09-12	21:15:05	-17.37	-177.3	404.7	5.5	SKS		-	-	null	81	0.41	0	0
					2006-01-02	22:13:41	-19.95	-178.1	589.4	6.4	SKS		-	-	null
					2006-02-26	03:08:28	-23.56	-179.87	540.7	6	SKS		81	0.41	fair
					2006-02-26	03:08:28	-23.56	-179.87	540.7	6	SKKS		-	-	null
					2007-04-09	02:24:29	-20.11	-177.98	608.7	5.5	SKS		-	-	null
ATSH	76.1627	39.7159	-200.9		2006-04-17	23:50:01	-12.47	166.26	32.3	5.6	SKS		62	0.51	fair	65	0.62	16.7	0.1
					2006-05-06	02:29:31	-24.99	179.76	519.3	5.5	SKS		50	0.62	fair
					2007-04-25	13:34:16	-14.23	166.83	69.7	5.9	SKS		83	0.72	fair
KMSK	76.2622	39.6343	-212.9		2006-04-17	23:50:01	-12.47	166.26	32.3	5.6	SKS		27	1.13	fair	30.2	0.89	7.6	0.3
					2006-04-30	08:17:35	-15.06	167.42	134.9	5.5	SKS		34	1.13	fair
					2006-06-02	07:31:35	-20.81	-178.56	587.3	5.5	SKS		34	0.62	fair
					2007-04-25	13:34:16	-14.23	166.83	69.7	5.9	SKS		28	0.92	fair
					2007-05-06	21:11:52	-19.39	-179.26	679.7	5.9	SKS		40	0.51	fair
					2007-05-06	21:11:52	-19.39	-179.26	679.7	5.9	SKKS		18	1.03	fair

## Sheet: G49633
Zhang, B., Bao, X., and Xu, Y., 2022, Seismic anisotropy in the central Tien Shan unveils rheology-controlled deformation during intracontinental orogenesis: Geology, v. 50, https://doi.org/10.1130/G49633.1
